# Supplementary material
Source: PubMed Central journal article supplement (PMC1867352)
Supplement: plntcell_tpc.106.049353_1.pdf [file plntcell_tpc.106.049353_1.pdf]

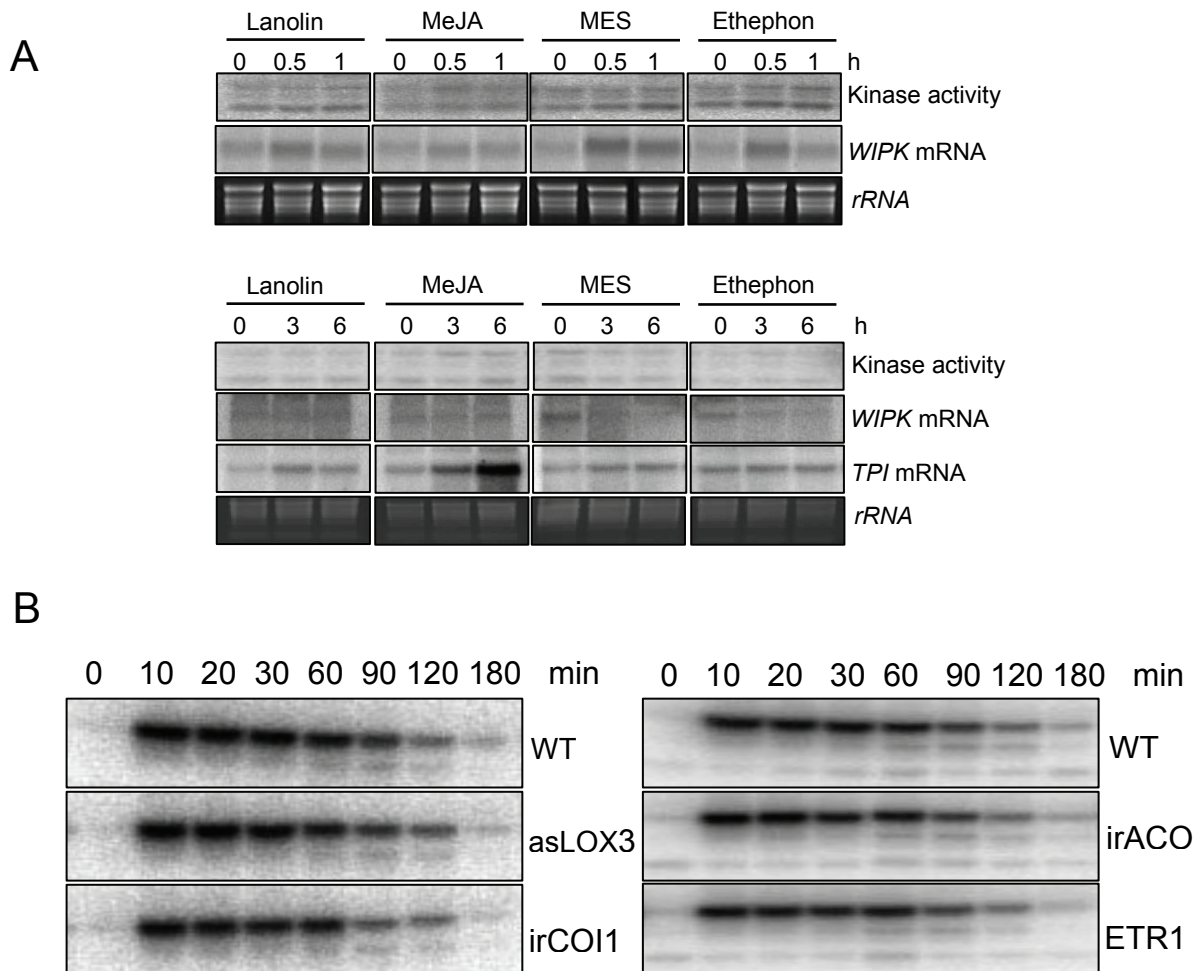

**Supplemental Figure 1. OS-elicited SIPK and WIPK activity is not mediated by JA and ethylene.**

**(A)** Treatment with exogenous JA and ethylene elicits neither SIPK activity nor the transcript accumulation of *WIPK*. Wild-type *N. attenuata* leaves were treated with 150  $\mu$ g of MeJA in 20  $\mu$ L of lanolin or 100  $\mu$ g of ethephon in 20  $\mu$ L of 5mM MES buffer (pH 5.5); lanolin and the MES buffer were used as controls. Samples were harvested at 0, 0.5, 1, 3, and 6 h; 4 individual leaves from replicate plants were pooled and in-gel kinase assays using MBP as a substrate and northern blotting were performed to measure kinase activity and the accumulation of *WIPK* and *TPI* transcripts. **(B)** MAPK activity in *N. attenuata* wild-type and transgenic lines. Wild-type (WT), asLOX3, and irCOI1 lines impaired in JA production and perception, respectively, as well as irACO and ETR1 lines impaired in ethylene production and perception, respectively, were all treated with W+OS; 4 replicate plants were harvested at the indicated times and pooled. In-gel kinase activity assays were conducted to detect MAPK activity.
