# Supplementary material
Source: PubMed Central journal article supplement (PMC1867352)
Supplement: plntcell_tpc.106.049353_3.pdf [file plntcell_tpc.106.049353_3.pdf]

**Supplemental Figure 3. SIPK activity and *WIPK* transcript levels do not change in systemic leaves of *N. attenuata* after wounding or applying *M. sexta* OS to wounds.**

Leaves at node +1 from rosette-stage *N. attenuata* were wounded with a pattern wheel; 20  $\mu$ L of water (W+W) or *M. sexta* oral secretions (W+OS) was applied to the wounds. Treated leaves (local) and systemic untreated leaves (-1 & +2) were harvested at indicated times. Four replicate leaves were pooled after harvesting. Kinase activity and transcript accumulation of *WIPK* in local and systemic leaves were analyzed by an in-gel kinase assay and northern blotting, respectively.
